# Supplementary material
Source: PubMed Central journal article supplement (PMC2869496)
Supplement: NIHMS195887-supplement-1_si_001.pdf [file NIHMS195887-supplement-1_si_001.pdf]

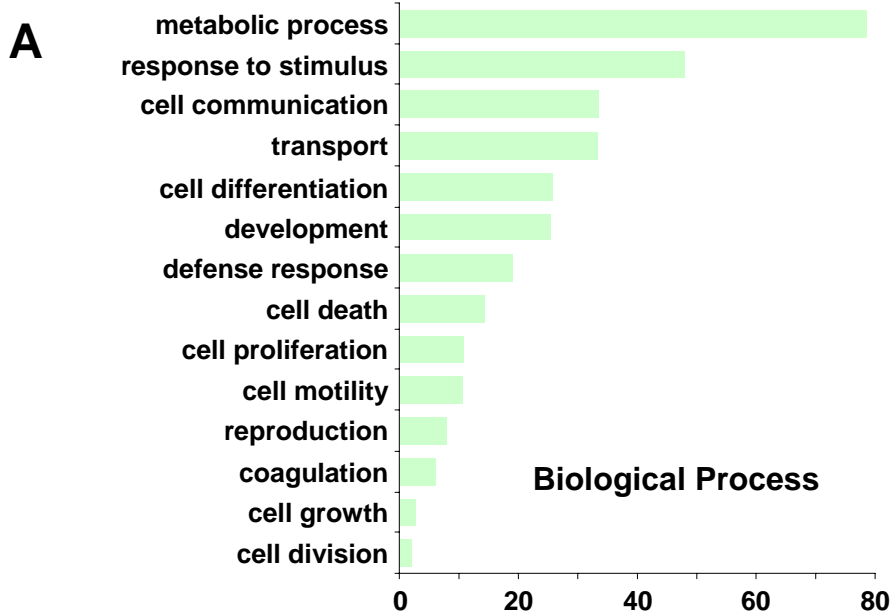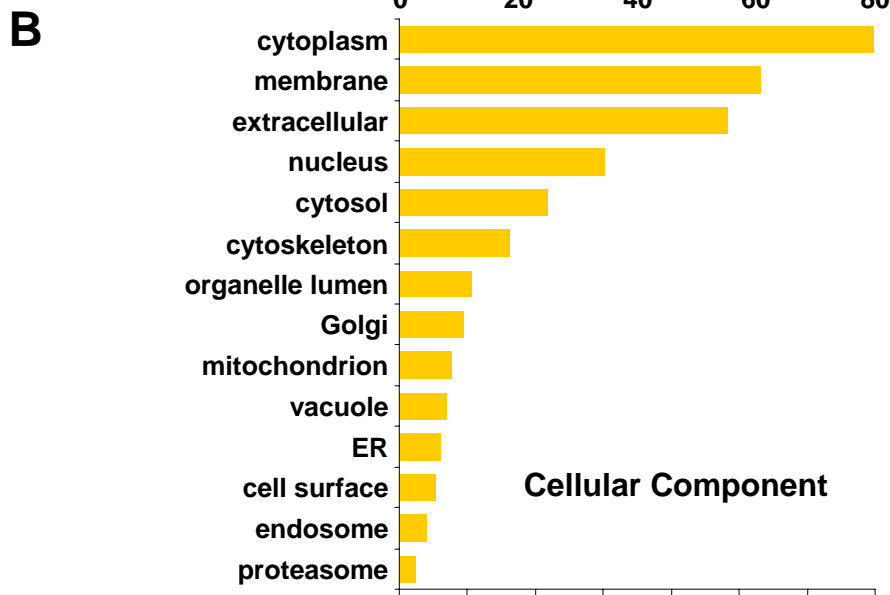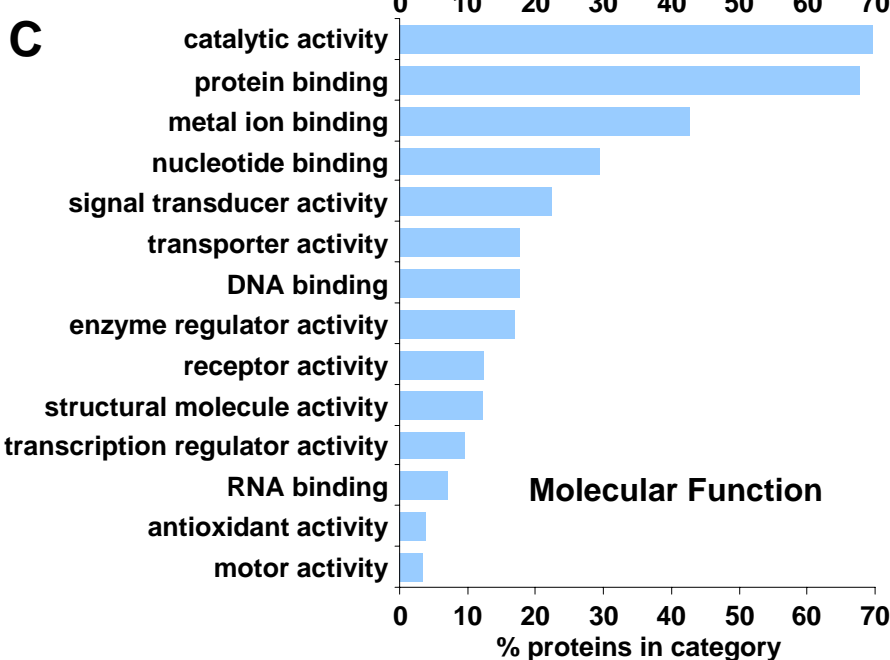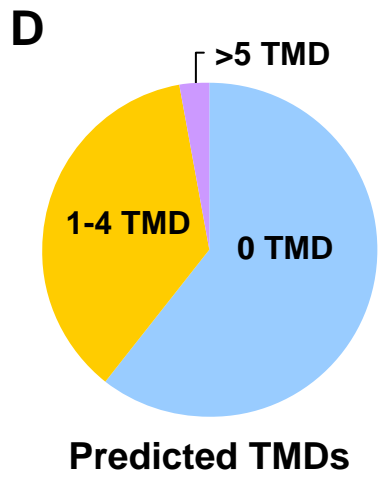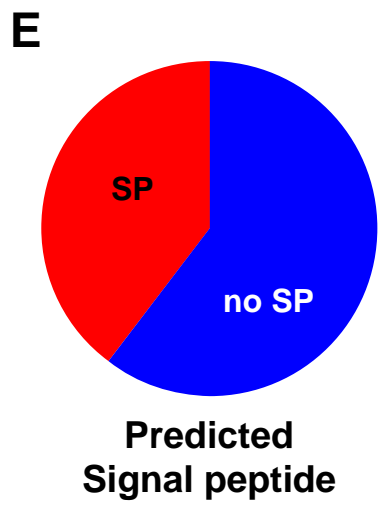

SI Figure 1

## **Functional enrichment of proteins detected in EPS.**

**A-C)** Shown are selected Gene Ontology (GO-Slim) categories of the EPS proteome.

**D)** Distribution of predicted transmembrane domain containing proteins (TMAP algorithm).

**E)** Distribution of predicted signal peptides (PrediSi algorithm).
